# Supplementary material for: Sleep Quality of Functional Gastrointestinal Disorder Patients in Class-Three Hospitals: A Cross-Sectional Study in Tianjin, China
Source: Hindawi journal article supplement (doi:10.1155/2018/3619748), 2018-06-07
Supplement: f1 [file 3619748.f1.pdf]

Supplementary file 1. The questionnaires used in this study.

General information

|                    |            |                |               |                                 |  |
|--------------------|------------|----------------|---------------|---------------------------------|--|
| Name               |            | Birth place    |               | Body weight<br>kg               |  |
| Gender             |            | Tel            |               | Course of<br>disease<br>(month) |  |
| Age                |            | Height cm      |               | Marriage                        |  |
| Education<br>level | Illiteracy | Primary school | Middle school | College and<br>above            |  |

Symptom of functional gastrointestinal disease

Here are 19 symptoms related to functional gastrointestinal disorders, in order to understand your condition more comprehensively and provide targeted treatment, please indicate the selection of this item with "√" in "□", according to your actual situation in the past six months.

Notes:

Severity:

Mild: Slight symptoms, need attention to feel

Moderate: obvious symptoms, but does not affect working life

Severe: obvious symptoms, affecting working life

Extremely severe: Conscious symptoms are obvious and seriously affect working life

1. Upper abdominal pain                      Yes  No

Severity in recent three months:

Mild  Moderate  Severe  Extremely severe

Frequency of Occurrence:

once every week                       2-4 times per week

5-6 times per week                       happens all the day

Improved after defecation or exhaust:

Yes  No

2. Big belly                                      Yes  No

Severity in recent three months:

Mild  Moderate  Severe  Extremely severe

Frequency of Occurrence:

once every week                       2-4 times per week

5-6 times per week                       happens all the day

3. Full swelling discomfort after meal                      Yes  No

Severity in recent three months:

Mild  Moderate  Severe  Extremely severe

Frequency of Occurrence:

once every week  2-4 times per week

5-6 times per week  happens all the day

4. Early satiety Yes  No

Severity in recent three months:

Mild  Moderate  Severe  Extremely severe

Frequency of Occurrence:

once every week  2-4 times per week

5-6 times per week  happens all the day

5. Disgusting after meals Yes  No

Severity in recent three months:

Mild  Moderate  Severe  Extremely severe

Frequency of Occurrence:

once every week  2-4 times per week

5-6 times per week  happens all the day

6. Belching Yes  No

Severity in recent three months:

Mild  Moderate  Severe  Extremely severe

Frequency of Occurrence:

once every week  2-4 times per week

5-6 times per week  happens all the day

7. Burning sensation in the abdomen Yes  No

Severity in recent three months:

Mild  Moderate  Severe  Extremely severe

Frequency of Occurrence:

once every week  2-4 times per week

5-6 times per week  happens all the day

Improved after defecation or exhaust:

Yes  No

8. Acid reflux Yes  No

Severity in recent three months:

Mild  Moderate  Severe  Extremely severe

Frequency of Occurrence:

once every week  2-4 times per week

5-6 times per week  happens all the day

9. Vomit Yes  No

Severity in recent three months:

Mild  Moderate  Severe  Extremely severe

Frequency of Occurrence:

once every week  2-4 times per week

5-6 times per week  happens all the day

10. Sensation or discomfort of foreign body in pharynx Yes  No

Severity in recent three months:

Mild  Moderate  Severe  Extremely severe

Frequency of Occurrence:

once every week  2-4 times per week

5-6 times per week  happens all the day

11. Lower abdominal pain Yes  No

Severity in recent three months:

Mild  Moderate  Severe  Extremely severe

Frequency of Occurrence:

once every week  2-4 times per week

5-6 times per week  happens all the day

Improved after defecation:

Yes  No

12. Lower abdomen discomfort (not painful) Yes  No

Severity in recent three months:

Mild  Moderate  Severe  Extremely severe

Frequency of Occurrence:

once every week  2-4 times per week

5-6 times per week  happens all the day

Improved after defecation:

Yes  No

Are there the following symptoms of abdominal pain and abdominal discomfort?

Change of defecation frequency Yes  No

Change of stool trait (shape) Yes  No

13. Sheep dung or hard poop Yes  No

Severity in recent three months:

Mild  Moderate  Severe  Extremely severe

Frequency of Occurrence:

1-2 days per month  3-6 days per month

7-10 days per month  more than 10 days per month

14. defecate difficulty Yes  No

Severity in recent three months:

Mild  Moderate  Severe  Extremely severe

Frequency of Occurrence:

1-2 days per month  3-6 days per month

7-10 days per month  more than 10 days per month

15. Dilute (soft) or watery Yes  No

Severity in recent three months:

Mild  Moderate  Severe  Extremely severe

Frequency of Occurrence:

1-2 days per month  3-6 days per month

7-10 days per month  more than 10 days per month

16. No sense of defecation Yes  No

Severity in recent three months:

Mild  Moderate  Severe  Extremely severe

Frequency of Occurrence:

1-2 days per month  3-6 days per month

7-10 days per month  more than 10 days per month

17. anxious defecation Yes  No

Severity in recent three months:

Mild  Moderate  Severe  Extremely severe

Frequency of Occurrence:

1-2 days per month  3-6 days per month

7-10 days per month  more than 10 days per month

18. Defecation less than 3 times a week Yes  No

Severity in recent three months:

Mild  Moderate  Severe  Extremely severe

Frequency of Occurrence:

one week per month  2 weeks per month

3 weeks per month  4 weeks per month

19. Defecation more than 3 times per day Yes  No

Severity in recent three months:

Mild  Moderate  Severe  Extremely severe

Frequency of Occurrence:

1-2 days per month  3-6 days per month

7-10 days per month  more than 10 days per month

The above 19 symptoms that have plagued you for the last six months (choose only one):

1  2  3  4  5

6  7  8  9  10

11  12  13  14  15

16  17  18  19

Pittsburgh sleep quality index PSQI

Please answer the following questions!

Here are some questions about your sleep in the last 1 months, please select or fill in the answers that best fit your actual situation for the last 1 months.

1. Usually you go to bed at \_\_\_ o'clock.

2. Usually it takes \_\_\_ to fall sleep.

3. Usually you get up at \_\_\_ o'clock.

4. Usually \_\_\_ hours actual sleep per night (not equal to bed time)

5. Please choose one of the following conditions affect sleep and worry:

a. Difficulty in falling asleep (no sleep in 30 minutes) (1) (2) < 1 times/week (3) 1-2 Times/week (4)  $\geq 3$  Times/week

b. Early Awakening at night (1) no (2) < 1 times/week (3) 1-2 Times/week (4)  $\geq 3$  Times/week

c. Go to the toilet at night (1) no (2) < 1 times/week (3) 1-2 Times/week (4)  $\geq 3$  Times/week

d. Poor breathing (1) no (2) < 1 times/week (3) 1-2 Times/week (4)  $\geq 3$  Times/week

e. Cough or Snore high (1) no (2) < 1 times/week (3) 1-2 Times/week (4)  $\geq 3$  Times/week

f. feeling cold (1) no (2) < 1 times/week (3) 1-2 Times/week (4)  $\geq 3$  Times/week

g. feeling hot (1) no (2) < 1 times/week (3) 1-2 Times/week (4)  $\geq 3$  Times/week

h. Nightmares (1) no (2) < 1 times/week (3) 1-2 Times/week (4)  $\geq 3$  Times/week

i. Pain or discomfort (1) no (2) < 1 times/week (3) 1-2 Times/week (4)  $\geq 3$  Times/week

j. Other things that affect sleep (1) no (2) < 1 times/week (3) 1-2 Times/week (4)  $\geq 3$  Times/week

If yes, please specify:

6. In general, you think your sleep quality (1) very good (2) better (3) poor (4) very poor

7. You use drug hypnosis (1) no (2) < 1 times/week (3) 1-2 Times/week (4)  $\geq 3$  Times/week

8. Do you often feel sleepy (1) no (2) < 1 times/weeks (3) 1-2 times/week (4)  $\geq 3$  Times/week

9. Do you have enough energy to do things (1) not (2) occasionally have (3) sometimes have (4) often have

PHQ-4 Patient Emotion Questionnaire

How long have you been bothered by the following questions over the past 2 weeks?

|                                                 | Not at all.<br>0 points | Some days<br>1 points | More than half of<br>the days<br>2 points | Almost<br>every day<br>3 points |
|-------------------------------------------------|-------------------------|-----------------------|-------------------------------------------|---------------------------------|
| To feel nervous, restless, or prone to<br>anger |                         |                       |                                           |                                 |
| Unable to stop or control worry                 |                         |                       |                                           |                                 |
| Feel depressed and hopeless                     |                         |                       |                                           |                                 |
| Have no interest or pleasure in doing<br>things |                         |                       |                                           |                                 |

Zung self-rating depression scale 1

Here are 20 items, please read each one carefully, make it clear, and then write "√" according to the actual feeling of your week in the appropriate column, please do not miss any of the project, and do not write more than 2 columns in the same line.

|                                                             | Have no or little time to have | sometim es | most times | Most or all of the time |
|-------------------------------------------------------------|--------------------------------|------------|------------|-------------------------|
| 1. I feel more nervous and anxious than usual               |                                |            |            |                         |
| 2. I feel scared for no reason                              |                                |            |            |                         |
| 3. I am easily upset or alarmed                             |                                |            |            |                         |
| 4. I think I may be going crazy                             |                                |            |            |                         |
| 5. I think everything is good, no unfortunat e              |                                |            |            |                         |
| 6. I tremble hands and feet                                 |                                |            |            |                         |
| 7. I am suffering from headache, neck pain and back pain    |                                |            |            |                         |
| 8. I feel vulnerable to weakness and fatigue                |                                |            |            |                         |
| 9. I feel calm, and easy to sit quietly                     |                                |            |            |                         |
| 10. I feel a rapid heartbeat                                |                                |            |            |                         |
| 11. I am distracted by a dizziness                          |                                |            |            |                         |
| 12. I have fainted, or feel like collapsed                  |                                |            |            |                         |
| 13. I feel exhaled easily                                   |                                |            |            |                         |
| 14. My hands and feet numb and tingling                     |                                |            |            |                         |
| 15. I am distressed because of stomach ache and indigestion |                                |            |            |                         |
| 16. I often have to urinate                                 |                                |            |            |                         |
| 17. My hands and feet are often dry and warm                |                                |            |            |                         |
| 18. I'm hot and blushing                                    |                                |            |            |                         |
| 19. I am easy to fall asleep and sleep well overnight       |                                |            |            |                         |
| 20. I have a bad dream                                      |                                |            |            |                         |

### Zung Zung self-rating depression scale 2

Here are 20 items, please read each one carefully, make it clear, and then write "√" according to the actual feeling of your week in the appropriate column, please do not miss any of the project, and do not write more than 2 columns in the same line.

|                                                        | Have no<br>or little<br>time to<br>have | someti<br>mes | most times | Most or all<br>of the time |
|--------------------------------------------------------|-----------------------------------------|---------------|------------|----------------------------|
| 1. I feel depressed, depressed                         |                                         |               |            |                            |
| 2. I feel good in the morning                          |                                         |               |            |                            |
| 3. I want to cry or cry                                |                                         |               |            |                            |
| 4. I do not sleep well at night                        |                                         |               |            |                            |
| 5. I eat as much as usual                              |                                         |               |            |                            |
| 6. My sexual function is normal                        |                                         |               |            |                            |
| 7. I feel weight loss                                  |                                         |               |            |                            |
| 8. I'm worried about constipation                      |                                         |               |            |                            |
| 9. My heart beat faster than usual                     |                                         |               |            |                            |
| 10. I feel tired for no reason                         |                                         |               |            |                            |
| 11. My mind is as clear as usual                       |                                         |               |            |                            |
| 12. I do things as usual do not feel difficult         |                                         |               |            |                            |
| 13. I am restless and hard to keep calm                |                                         |               |            |                            |
| 14. I am hopeful for the future                        |                                         |               |            |                            |
| 15. I am more easily irritated than usual              |                                         |               |            |                            |
| 16. I think it's easy to decide what                   |                                         |               |            |                            |
| 17. I feel that I am a useful and indispensable person |                                         |               |            |                            |
| 18. My life is meaningful                              |                                         |               |            |                            |
| 19. If I die, others will be fare better               |                                         |               |            |                            |
| 20. I still like my favorite things                    |                                         |               |            |                            |



## Summary

|                                            |                                                                                                                                                                                                                                                                                                                                                                                                                                                                                                                                                                                                                                                                                                                                                                                                                  |
|--------------------------------------------|------------------------------------------------------------------------------------------------------------------------------------------------------------------------------------------------------------------------------------------------------------------------------------------------------------------------------------------------------------------------------------------------------------------------------------------------------------------------------------------------------------------------------------------------------------------------------------------------------------------------------------------------------------------------------------------------------------------------------------------------------------------------------------------------------------------|
| <p>Are your symptoms related to sleep?</p> | <p>Yes <input type="checkbox"/> Not sure <input type="checkbox"/> No <input type="checkbox"/></p> <p>If relevant, symptoms cause poor sleep <input type="checkbox"/></p> <p>poor sleep cause symptoms <input type="checkbox"/></p>                                                                                                                                                                                                                                                                                                                                                                                                                                                                                                                                                                               |
| <p>How do you treat sleep problems</p>     | <p>A. Have you ever seen a psych clinic?</p> <p>Never <input type="checkbox"/></p> <p>Sometimes <input type="checkbox"/></p> <p>Regularly <input type="checkbox"/></p> <p>B. Have you seen the department of Neurology?</p> <p>Never <input type="checkbox"/></p> <p>Sometimes <input type="checkbox"/></p> <p>Regularly <input type="checkbox"/></p> <p>C. Use of sleeping pills</p> <p>Never <input type="checkbox"/> Sometimes <input type="checkbox"/></p> <p>quite often <input type="checkbox"/> Almost everyday <input type="checkbox"/></p> <p>What kind of sleeping pill to take: __</p> <p>dosage: __</p> <p>Days taken: __</p> <p>D What do you think of sleeping pills?</p> <p>Sleeping pills worked. <input type="checkbox"/></p> <p>Sleeping pills are getting worse. <input type="checkbox"/></p> |
